# Supplementary material for: Potential Integration of Bridge Information Modeling and Life Cycle Assessment/Life Cycle Costing Tools for Infrastructure Projects within Construction 4.0: A Review
Source: MDPI journal article supplement (doi:10.3390/su152015049), 2023-10-19
Supplement: s1 [file s1]

Table S1. List of reviewed articles (BIM- LCA integration)

| Reference | Title                                                                                               | Year | Country | BIM Model                                 |     | LCA Method                                      |           |                             |               |                    |           |                   |             |                | Software Integration                                                                       |             |                                   | Results Communication                                                                                                                     |  |
|-----------|-----------------------------------------------------------------------------------------------------|------|---------|-------------------------------------------|-----|-------------------------------------------------|-----------|-----------------------------|---------------|--------------------|-----------|-------------------|-------------|----------------|--------------------------------------------------------------------------------------------|-------------|-----------------------------------|-------------------------------------------------------------------------------------------------------------------------------------------|--|
|           |                                                                                                     |      |         | Building Typology                         | LOD | Functional Unit                                 | Life Span | LCI Database                | LCA phases    |                    |           |                   |             | BIM tool       | Data Exchange Procedure                                                                    | LCA tool    | Environmental Impact indicators   | Key point                                                                                                                                 |  |
|           |                                                                                                     |      |         |                                           |     |                                                 |           |                             | Product A1-A3 | Construction A4-A5 | Use B1-B7 | End of Life C1-C4 | Recycling D |                |                                                                                            |             |                                   |                                                                                                                                           |  |
| [1]       | BIM-integrated LCA to automate embodied carbon assessment of prefabricated buildings                | 2022 | China   | typical prefabricated high-rise buildings | –   | Complete building                               | –         | Obtained from the BIM model | 3             | 3                  | 7         | 7                 | 7           | Autodesk Revit | BIM → ifc file →Excel → SimaPro                                                            | SimaPro     | Embodied carbon                   | Automation of the embodied carbon assessment of prefabricated buildings at five levels: material, component, assembly, flat, and building |  |
| [2]       | BIM-based life cycle assessment for different structural system scenarios of a residential building | 2022 | Egypt   | residential building                      | 400 | one square metre of the usable floor area (UFA) | 50 years  | Ecoinvent                   | A1, A3        | 3                  | B6, B7    | 3                 | 3           | Autodesk Revit | From BIM (BoQs) to OneClickLCA → Synchro pro                                               | OneClickLCA | GWP, AP, EP, ODP, POCP, PED       | Comparison of 3 different structural scenarios                                                                                            |  |
| [3]       | Development of Building Information Modeling Template for Environmental Impact Assessment           | 2021 | Korea   | 18 storey apartment building              | 300 | Complete building                               | 40 years  | Korean LCI database         | 3             | 7                  | B1 B2     | 7                 | 7           | Autodesk Revit | Including life cycle environmental impact into BIM models (LCA results presented in Excel) | –           | GWP, ADP, AP, EP, ODP, POCP       | Developing BIM-LCA integration approach                                                                                                   |  |
| [4]       | Life Cycle Assessment Framework for Embodied Environmental Impacts of Building Construction Systems | 2021 | Egypt   | 2 storey university student center        | –   | Complete building                               | 50 years  | EPD                         | 3             | 3                  | 3         | 3                 | 3           | Bentley        | From BIM (BoQs) to Excel sheet                                                             | –           | Non-renewable primary energy, GWP | comparison of a life cycle assessment framework for embodied environmental impacts of three building types                                |  |

|     |                                                                                                                                                     |      |           |                                |   |                                                 |          |                               |   |   |   |   |   |                                   |                                                                                   |                |                                                                         |                                                                        |
|-----|-----------------------------------------------------------------------------------------------------------------------------------------------------|------|-----------|--------------------------------|---|-------------------------------------------------|----------|-------------------------------|---|---|---|---|---|-----------------------------------|-----------------------------------------------------------------------------------|----------------|-------------------------------------------------------------------------|------------------------------------------------------------------------|
| [5] | Building information modelling application of material, water, and climate footprint analysis                                                       | 2021 | Germany   | 3 storey multi-family building | – | one square metre of the usable floor area (UFA) | –        | GaBi                          | 3 | 7 | 7 | 7 | 7 | Autodesk Revit                    | Linking BIM materials' information with LCA data by using a developed application | openLCA        | GWP                                                                     | Comparison of three LCA methods                                        |
| [6] | An integrated approach of BIM-enabled LCA and energy simulation: The optimized solution towards sustainable development                             | 2021 | Australia | one-story brick veneered house | – | Complete building                               | 60 years | In-house database in Tally    | 3 | 3 | 3 | 3 | 3 | Autodesk Revit                    | Revit → Tally                                                                     | Tally          | GWP, AP, RED, EP, ODP, SFP,NRED, PED                                    | Sensitivity analysis                                                   |
| [7] | Life cycle environmental impact assessment to manage and optimize construction waste using Building Information Modeling (BIM)                      | 2021 | Canada    | 12 storey commercial building  | – | Complete building                               | 75 years | ATHENA Impact Estimator       | 7 | 3 | 3 | 3 | 7 | Autodesk Revit, Navisworks, Tekla | From BIM to external database                                                     | Athena IE LCID | GWP, AP, HH, EP, ODP, SMP                                               | Comparison of a the conventional method and some rules of DfD approach |
| [8] | The BIM-Based multi-optimization approach in order to determine the trade-off between embodied and operation energy focused on renewable energy use | 2021 | Iran      | 8-story residential building   | – | exterior shell materials                        | 60 years | In-house database in LCA tool | 3 | 3 | 3 | 3 | 3 | Autodesk Revit, Rhino software    | From BIM (BoQs) to Athena<br>From Rhino to EnergyPlus                             | Athena IE LCID | Renewable energy use, embodied energy, operational energy, total energy | Parametric Simulation                                                  |

|      |                                                                                                                               |      |             |                                              |                 |                                                 |          |                       |   |   |                |            |   |                        |                                                                                                                                                                           |   |                               |                                                                       |
|------|-------------------------------------------------------------------------------------------------------------------------------|------|-------------|----------------------------------------------|-----------------|-------------------------------------------------|----------|-----------------------|---|---|----------------|------------|---|------------------------|---------------------------------------------------------------------------------------------------------------------------------------------------------------------------|---|-------------------------------|-----------------------------------------------------------------------|
| [9]  | Integrated BIM-Based LCA for the Entire Building Process Using an Existing Structure for Cost Estimation in the Swiss Context | 2020 | Switzerland | mixed-use timber building                    | LOD 100-LOD 400 | one square metre of the usable floor area (UFA) | –        | KBOB/Bauteilkatalog   | 3 | 7 | B4             | C3, C4     | 7 | Autodesk Revit, Dynamo | From BIM (BoQs) to Dynamo LCA database → Dynamo                                                                                                                           | – | Grey energy, CO2eq            | Comparison of environmental impacts in different LODs                 |
| [10] | Comparative BIM-based Life Cycle Assessment of Uruguayan timber and concrete-masonry single-family houses in design stage     | 2020 | Uruguay     | Two single-family houses                     | 300             | one square metre of heating area                | 60 years | Ecoinvent Version 2.0 | 3 | 3 | B2, B3, B4, B6 | C1, C2, C4 | 7 | ArchiCAD 19            | From BIM (BoQs) to Excel Multiplying BOQ with environmental impact factors                                                                                                | – | GWP, AP, EP, FWE, HT, ODP     | Comparison of two design options                                      |
| [11] | An integrated life cycle assessment of different façade systems for a typical residential building in Ghana                   | 2020 | Ghana       | Single storey building                       | –               | 180.50 m2 GFA                                   | 50 years | ICE database          | 3 | 3 | B6             | 7          | 7 | Autodesk Revit         | From BIM (BoQs) to EXCEL (carbon coefficient/ energy coefficient) (embodied) BIM →gbxml → IES-VE (operational energy → energy/carbon conversion factor → operational GWP) | – | GWP, cumulative energy demand | Comparison of LCA and LCC between four different facade systems       |
| [12] | A BIM-LCA approach for estimating the greenhouse gas emissions of large-scale public buildings: A case study                  | 2020 | China       | Guangdong Inkstone Culture Museum            | –               | one square metre of the gross floor area (GFA)  | 50 years | Literature            | 3 | 3 | 3              | 3          | 7 | Autodesk Revit         | BOQ and carbon factor→Excel BIM →gbXML →Designbuilder                                                                                                                     | – | Co2 emissions                 | Comparison of CO2 emissions over the life cycle, sensitivity analysis |
| [13] | Evaluation of BIM-based LCA results for building design                                                                       | 2020 | Switzerland | three storey extension of an office building | –               | Complete building                               | –        | KBOB                  | 3 | 7 | 7              | C3, C4     | 7 | Autodesk Revit, Dynamo | BIM→ BOQ (with KBOB ID) → Dynamo LCA factors → Excel → Dynamo                                                                                                             | – | GWP                           | Identifying hotspots of environmental impacts                         |

|      |                                                                                                                             |      |             |                                            |     |                                     |          |                                                                                     |   |   |          |                  |   |                        |                                                                                                                                                                              |                      |                                       |                                                                        |
|------|-----------------------------------------------------------------------------------------------------------------------------|------|-------------|--------------------------------------------|-----|-------------------------------------|----------|-------------------------------------------------------------------------------------|---|---|----------|------------------|---|------------------------|------------------------------------------------------------------------------------------------------------------------------------------------------------------------------|----------------------|---------------------------------------|------------------------------------------------------------------------|
| [14] | Detailed Assessment of Embodied Carbon of HVAC Systems for a New Office Building Based on BIM                               | 2020 | Switzerland | Seven storey an office building            | 300 | Complete building                   | 60 years | KBOB, Ecoinvent                                                                     | 3 | 7 | B4<br>B6 | C1,<br>C2,<br>C3 | 7 | Autodesk Revit, Dynamo | From BIM (BoQs) to Dynamo LCA database to Dynamo to Excel                                                                                                                    | –                    | GWP                                   | Comparison design alternatives                                         |
| [15] | Assessing the sustainability of alternative structural solutions of a building: A case study                                | 2020 | Lithuania   | Structural model of a residential building | –   | Complete building                   | –        | In-house database in Simapro                                                        | 3 | 7 | 7        | 7                | 7 | Tekla                  | From BIM (BoQs) to SimaPro                                                                                                                                                   | SimaPro              | Primary energy demand, GWP, ODP       | Comparison between three structural design alternatives                |
| [16] | Development of a BIM-based Environmental and Economic Life Cycle Assessment tool                                            | 2020 | Morocco     | 250-m high tower                           | 200 | Complete building                   | 50 years | CYPE, Ecoinvent                                                                     | 3 | 3 | 3        | 3                | 7 | Autodesk Revit         | BIM model → Including LCA data into BIM objects                                                                                                                              | BIMEELCA             | ADP, AP, EP, GWP, ODP. POCP, prE, nRE | Validating the applicability of developed BIM-LCA integration approach |
| [17] | BIM-based life cycle assessment and life cycle costing of an office building in Western Europe                              | 2020 | Netherlands | office building under construction         | –   | Complete building                   | 50 years | IBU, OKOBAUDAT, MRPI, Ecoinvent, EPD                                                | 7 | 3 | 3        | 3                | 7 | Autodesk Revit         | From BIM (BoQs) to LCA data → Excel → BIM objects                                                                                                                            | BIMEELCA             | AP, ADP, POCP, ODP, prE, nRE          | Automatic simulations during the design and operation phase            |
| [18] | Reduction strategies for greenhouse gas emissions from high-speed railway station buildings in a cold climate zone of China | 2020 | China       | high-speed railway station (HSRS) building | –   | 1 m2 of unit gross floor area (GFA) | 50 years | Literature (the Chinese national standard for building carbon emission calculation) | 3 | 7 | B4<br>B6 | 7                | 7 | Autodesk Revit         | BIM model →BOQ/Quota calculation method (the quantities of unclear materials, such as the steel bars in concrete structure) → Excel-based LCA tool<br>BIM model → EnergyPlus | Excel based LCA tool | GHG emissions                         | Sensitivity analysis of multiple design variables of building envelop  |

|       |                                                                                                                                                                          |      |         |                        |   |                   |          |                                              |   |   |             |       |   |                |                                                                                                                                                             |                                                                                         |                                                      |                                                                                      |
|-------|--------------------------------------------------------------------------------------------------------------------------------------------------------------------------|------|---------|------------------------|---|-------------------|----------|----------------------------------------------|---|---|-------------|-------|---|----------------|-------------------------------------------------------------------------------------------------------------------------------------------------------------|-----------------------------------------------------------------------------------------|------------------------------------------------------|--------------------------------------------------------------------------------------|
| [19]) | Modular approach to multi-objective environmental optimization of buildings                                                                                              | 2020 | Hungary | residential building   | – | Complete building | 50 years | Ecoinvent database with certain modification | 3 | 3 | B2-B4<br>B6 | C2-C4 | 7 | Rhinoceros     | Honeybee (model)→LCA (python)<br>Honeybee →EnergyPlus                                                                                                       | Ladybug&Honeybee plug-in for Grasshopper with custom extensions to include the LCA data | GWP, ODP, AP, POCP, EP, and cumulative energy demand | Parametric design                                                                    |
| [20]  | BIM-based life cycle environmental performance assessment of single-family houses: Renovation and reconstruction strategies for aging building stock in British Columbia | 2020 | Canada  | single-family house    | – | Complete building | 50 years | Ecoinvent in SimaPro                         | 3 | 3 | 3           | 3     | 7 | Autodesk Revit | From BIM (BoQs) to SimaPro<br>BIM →HOT 2000                                                                                                                 | Athena IE LCID                                                                          | GHG emissions                                        | Comparison of six design scenarios                                                   |
| [21]  | Integration of BIM and Energy Consumption Modelling for Manufacturing Prefabricated Components: A Case Study in China                                                    | 2019 | China   | Middle School          | – | Complete building | 40 years | literature                                   | 3 | 3 | 7           | 7     | 7 | Autodesk Revit | Including energy consumption inventory in BIM objects, Extracting material information from the BIM model → Excel → calculating energy consumption in Excel | Excel based LCA tool                                                                    | Energy consumption                                   | Comparison of energy consumption between different materials during different stages |
| [22]  | Development of a carbon emissions analysis framework using building information modeling and life cycle assessment for the construction of hospital projects             | 2019 | China   | a four storey building | – | –                 | 50 years | Carbon factor from literature                | 3 | 3 | 3           | 3     | 3 | Autodesk Revit | BIM → Glondon → BOQ → carbon factor<br>BIM → GBS                                                                                                            | spreadsheet, Glodon GTJ2018                                                             | CO2eq                                                | Carbon emission analysis of materials, work types                                    |

|      |                                                                                                                                |      |             |                                        |                    |                                       |          |                                                                                             |   |   |    |        |   |                        |                                                                                                                     |              |                                                            |                                                     |
|------|--------------------------------------------------------------------------------------------------------------------------------|------|-------------|----------------------------------------|--------------------|---------------------------------------|----------|---------------------------------------------------------------------------------------------|---|---|----|--------|---|------------------------|---------------------------------------------------------------------------------------------------------------------|--------------|------------------------------------------------------------|-----------------------------------------------------|
| [23] | Integrating building information modeling and life cycle assessment in the early and detailed building design stages           | 2019 | Canada      | four-storey multi-residential building | 100, 300           | Complete building                     | –        | Ecoinvent Version 3.3                                                                       | 3 | 3 | 3  | 3      | 3 | Autodesk Revit         | Creating a database compiling all the different options for each assembly and all the corresponding LCI using Revit | Open LCA     | Climate change, ecosystem quality, human health, resources | Comparison of two different LOD                     |
| [24] | Continuous BIM-based assessment of embodied environmental impacts throughout the design process                                | 2019 | Switzerland | multi-family house                     | 100, 200, 300, 400 | one square metre of heated floor area | 60 years | Swiss Buildings Database, KBOB and Bauteilkatalog, based on Ecoinvent 3.3 background data s | 3 | 7 | B4 | C3, C4 | 7 | 3D model in Rhinoceros | From 3D model to BOQ in Excel<br>LCA database to Excel                                                              | –            | GWP                                                        | Improving BIM-LCA integration approaches            |
| [25] | Evaluation of BIM based LCA in early design phase (low LOD) of buildings                                                       | 2019 | Norway      | commercial building                    | 200, 300, 350      | m3 for building materials             | –        | EPD                                                                                         | 3 | 7 | 7  | 7      | 7 | Autodesk Revit         | BIM model →BOQ →Excel<br>→One Click LCA                                                                             | OneClick LCA | GWP                                                        | Comparison of four alternatives with different LODs |
| [26] | Integrated optimization with building information modeling and life cycle assessment for generating energy efficient buildings | 2019 | Brazil      | a multi-story residential building     | –                  | Complete building                     | –        | GaBi                                                                                        | 3 | 3 | B6 | 7      | 7 | Autodesk Revit         | From BIM to Open Tally/GBS                                                                                          | Tally        | Energy, AP, EP, GWP, ODP, SP, PED, PE-Re, PE-NRe           | Simulation of alternative construction components   |
| [27] | Life cycle assessment methodology integrated with BIM as a decision-making tool at early-stages of building design             | 2019 | Brazil      | multi-story office building            | –                  | Complete building                     | –        | Ecoinvent Version 3                                                                         | 3 | 3 | 3  | 3      | 7 | Autodesk Revit         | From BIM to Open LCA/GBS                                                                                            | Open LCA     | Human health, ecosystem quality, resource depletion        | Comparison of two construction methods              |

|      |                                                                                                                                                              |      |         |                                         |     |                                                 |          |                                         |   |    |                    |            |   |                                   |                                                    |                     |                                     |                                    |
|------|--------------------------------------------------------------------------------------------------------------------------------------------------------------|------|---------|-----------------------------------------|-----|-------------------------------------------------|----------|-----------------------------------------|---|----|--------------------|------------|---|-----------------------------------|----------------------------------------------------|---------------------|-------------------------------------|------------------------------------|
| [28] | Simulation-Based Multi-Objective Optimization of Institutional Building Renovation Considering Energy Consumption, Life-Cycle Cost and Life-Cycle Assessment | 2019 | Canada  | Two-storey office building              | 300 | Complete building                               | –        | ICE database                            | 3 | A5 | 3                  | C1, C3, C4 | 7 | Autodesk Revit                    | Database link to BIM                               | Athena IE LCID      | GWP, EE, OE                         |                                    |
| [29] | How to design buildings with Life Cycle Assessment by accounting for the material flows in refurbishment                                                     | 2019 | Finland | four-storey building                    | –   | one square metre of heated floor area           | 60 years | EPD, in-house database in One Click LCA | 3 | 7  | B4 B5              | 3          | 7 | –                                 | From BIM (BoQs) to OneClickLCA                     | OneClickLCA         | GWP                                 | Comparison between three scenarios |
| [30] | Comparative Whole-Building Life Cycle Assessment of Renovation and New Construction                                                                          | 2019 | US      | 2-story, 5,500 m2, stand-alone building | –   | Complete building                               | –        | GaBi                                    | 3 | A4 | 3                  | C2, C3, C4 | 3 | Autodesk Revit                    | From BIM to Excel sheet                            | Tally               | AP, EP, GWP, ODP, SMP, NRED         |                                    |
| [31] | Development of an Approach to Assess the Life Cycle Environmental Impacts and Costs of General Hospitals through the Analysis of a Belgian Case              | 2019 | Belgium | 7 storey hospital                       | –   | Complete building                               | –        | Ecoinvent 2.2                           | 3 | 3  | B2, B4, B5, B6, B7 | C1, C2, C3 | 7 | Autodesk Revit                    | From BIM to Excel sheet                            | SimaPro version 8.3 | GWP, PE, AP, HTP, PM                |                                    |
| [32] | An integrated BIM-based framework for the optimization of the trade-off between embodied and                                                                 | 2018 | Sweden  | A semi-detached low-energy dwelling     | –   | one square metre of the usable floor area (UFA) | 50 years | Primary energy factor from literature   | 3 | 7  | B1, B4, B6, B7     | 7          | 7 | Autodesk Revit, Dynamo, Slingshot | From BIM to Dynamo → gbXML → Grasshopper (Archsim) | –                   | Embodied energy, operational energy | Parametric design                  |

|      |                                                                                                                                              |      |         |                                         |     |                                     |          |                      |   |   |            |            |   |                                 |                                                                                          |                      |                                                          |                                                       |
|------|----------------------------------------------------------------------------------------------------------------------------------------------|------|---------|-----------------------------------------|-----|-------------------------------------|----------|----------------------|---|---|------------|------------|---|---------------------------------|------------------------------------------------------------------------------------------|----------------------|----------------------------------------------------------|-------------------------------------------------------|
|      | operational energy                                                                                                                           |      |         |                                         |     |                                     |          |                      |   |   |            |            |   |                                 |                                                                                          |                      |                                                          |                                                       |
| [33] | LCA and BIM: Visualization of environmental potentials in building construction at early design stages                                       | 2018 | Austria | residential building                    | 200 | Complete building                   | –        | Ecoinvent            | – | – | –          | –          | – | Autodesk Revit, Dynamo          | From BIM (BoQs) to geometric and physical characteristics (Dynamo)                       | –                    | GWP                                                      | Comparing a wide variety of possible construction     |
| [34] | A BIM based tool for assessing embodied energy for buildings                                                                                 | 2018 | China   | a cast-in-situ concrete frame structure | –   | Complete building                   | –        | ICE database         | 3 | 3 | 7          | 7          | 7 | Autodesk Revit                  | BIM→ developed plugin<br>ICE database and other databases → developed plugin             | developed plugin     | GWP                                                      | Validating the developed BIM-LCA integration approach |
| [35] | Building-information-modeling enabled life cycle assessment, a case study on carbon footprint accounting for a residential building in China | 2018 | China   | Village building                        | 300 | 1 m2 of unit gross floor area (GFA) | 50 years | CLCD, Ecoinvent,ELCD | 3 | 3 | 3          | 3          | 7 | Autodesk Revit                  | From BIM (Glondon BIM 5D) BOQs to Excel to eBalance<br>From BIM to gbXML → Designbuilder | –                    | GWP                                                      | Hotpot identification                                 |
| [36] | BIM-Based LCA Method to Analyze Envelope Alternatives of Single-Family Houses: Case Study in Uruguay                                         | 2018 | Uruguay | single-family house                     | 300 | 2 m2 of unit gross floor area (GFA) | 60 years | Ecoinvent            | 3 | 3 | B2, B4, B6 | C1, C2, C4 | 7 | Graphisoft Archicad             | From BIM (BoQs) to Excel sheet                                                           | Excel based LCA tool | GWP, ODP, Freshwater aquatic ecotoxicity, human toxicity | Comparison of three design scenarios of envelopes     |
| [37] | Comparative analysis between a complete LCA study and results from a                                                                         | 2018 | Brazil  | five typologies of wall systems         | –   | 1 m2 of the nonstructural shell     | –        | Ecoinvent            | 7 | 7 | 7          | 7          | 7 | Autodesk Revit, Autodesk Dynamo | From BIM to Gabi/Tally                                                                   | Tally, Gabi          | AP, EP, GWP, ODP, SP, nRE, prE                           | Comparison of different walls                         |



|      |                                                                                                                                       |      |              |                                   |   |                                     |          |                 |   |   |   |   |   |                                 |                                                        |                      |                                |                                                  |
|------|---------------------------------------------------------------------------------------------------------------------------------------|------|--------------|-----------------------------------|---|-------------------------------------|----------|-----------------|---|---|---|---|---|---------------------------------|--------------------------------------------------------|----------------------|--------------------------------|--------------------------------------------------|
|      | BIM-LCA plug-in                                                                                                                       |      |              |                                   |   |                                     |          |                 |   |   |   |   |   |                                 |                                                        |                      |                                |                                                  |
| [38] | Life cycle assessment and environmental-based choices at the early design stages: an application using building information modelling | 2018 | Brazil       | –                                 | – | Wall and Roofing system             | –        | Ecoinvent       | 7 | 7 | 7 | 7 | 7 | Autodesk Revit, Autodesk Dynamo | Including LCA data into BIM objects                    | Excel based LCA tool | GWP, AP, EP, ODP, SP, nRE, prE | Comparison of different material specification   |
| [39] | BIM-embedded life cycle carbon assessment of RC buildings using optimised structural design alternatives                              | 2018 | UK           | 10-storey residential development | – | 1 m2 of unit gross floor area (GFA) | –        | EPD, literature | 3 | 7 | 7 | 7 | 7 | Autodesk Revit                  | From BIM (BoQs) to BIM schedules<br>EPD → BIM schedule | Excel based LCA tool | Embodied CO2eq                 | Parametric design                                |
| [40] | A BIM–LCA integration technique to embodied carbon estimation applied on wall systems in Brazil                                       | 2018 | Brazil       | –                                 | – | –                                   | –        | Ecoinvent       | 3 | 7 | 7 | 7 | 7 | ArchiCAD                        | SimaPro → carbon footprint → ArchiCAD → Excel          | SimaPro              | CO2eq                          | Comparison of two different construction methods |
| [41] | Building information modeling-based model for calculating direct and indirect emissions in construction projects                      | 2017 | Saudi Arabia | 3 storey building                 | – | Complete building                   | 50 years | Athena IE LCID  | 3 | 3 | 3 | 3 | 7 | Autodesk Revit                  | BIM model to Access to Athena impact estimator         | Athena IE LCID       | GWP, AP, EP, ODP, SP           | Hotpot identification                            |

|      |                                                                                                                                                 |      |          |                                           |     |                   |          |                                                        |   |    |   |   |   |                |                                                                            |                 |                                                    |                                                            |
|------|-------------------------------------------------------------------------------------------------------------------------------------------------|------|----------|-------------------------------------------|-----|-------------------|----------|--------------------------------------------------------|---|----|---|---|---|----------------|----------------------------------------------------------------------------|-----------------|----------------------------------------------------|------------------------------------------------------------|
| [42] | Integration of BIM and LCA: Evaluating the environmental impacts of building materials at an early stage of designing a typical office building | 2017 | Brazil   | multi-story office building               | –   | Complete building | 50 years | GaBi                                                   | 3 | 7  | 3 | 3 | 7 | Autodesk Revit | BIM → Tally/GBS                                                            | –               | AP, EP, GWP, ODP, SP, prE, nRE, energy consumption | Hotpot identification                                      |
| [43] | A benchmark study of BIM-based whole-building life-cycle assessment tools and processes                                                         | 2017 | US       | simple unit space                         | –   | Wall              | 60 years | In-house database in Tally and Athena Impact Estimator | 7 | 7  | 7 | 7 | 7 | Autodesk Revit | BIM →Tally<br>BIM →BOQ → Athena Impact Estimator                           | Tally Athena IE | ODP, GWP, AP, SP, prE, nRE                         | Sensitivity analysis                                       |
| [44] | An integrated BIM-based framework for minimizing embodied energy during building design                                                         | 2016 | Sweden   | semi-detached dwelling                    | –   | Complete building | 50 years | EPD inventory                                          | 3 | A4 | 7 | 7 | 7 | Autodesk Revit | From BIM (BoQs) (extracted by ETL) to EPDs                                 | –               | nRE, CO2eq emissions                               | Comparison of nineteen wall scenarios                      |
| [45] | BIM in LCA / LCEA Analysis : Comparative analysis of Multi-family House and Single-family                                                       | 2016 | Portugal | multi-family house vs single-family house | –   | Complete building | 60 years | GaBi                                                   | 3 | 3  | 3 | 3 | 3 | Autodesk Revit | From BIM to Tally                                                          | Tally           | AP, EP, GWP, ODP, SP, nRE, prE                     | Comparison between single-family and multi-family house    |
| [46] | Calculation of a building's life cycle carbon emissions based on Ecotect and building information modeling                                      | 2016 | China    | Run Run Shaw Architectural building       | –   | Complete building | –        | Emission factor in China                               | 3 | 3  | 3 | 3 | 7 | Autodesk Revit | From BIM (BoQs) to Excel sheet                                             | –               | Energy consumption, carbon emission                | Sensitivity analysis                                       |
| [47] | Life cycle environmental performance of material specification: a BIM-enhanced                                                                  | 2015 | US       | Two-storey primary schoolbuilding         | 200 | Complete building | 30 years | ATHENA Impact Estimator                                | 3 | 3  | 3 | 3 | 7 | Autodesk Revit | BIM (IFC) → ATHENA Impact Estimator<br>BIM → Green Building Studio (GBS) → | Athena IE LCID  | GWP, HH                                            | Hotpot identification, comparison of five design scenarios |

|      |                                                                                                                                      |      |         |                                                            |     |                                       |                          |                                     |   |   |                |   |   |                |                                                                             |                     |                                          |                                                     |
|------|--------------------------------------------------------------------------------------------------------------------------------------|------|---------|------------------------------------------------------------|-----|---------------------------------------|--------------------------|-------------------------------------|---|---|----------------|---|---|----------------|-----------------------------------------------------------------------------|---------------------|------------------------------------------|-----------------------------------------------------|
|      | comparative assessment                                                                                                               |      |         |                                                            |     |                                       |                          |                                     |   |   |                |   |   |                | ATHENA Impact Estimator                                                     |                     |                                          |                                                     |
| [48] | Green Template for Life Cycle Assessment of Buildings Based on Building Information Modeling: Focus on Embodied Environmental Impact | 2015 | Korea   | A standard 18 storey Korean apartment building             | 300 | Complete building                     | –                        | Korea life-cycle inventory database | 3 | 3 | 3              | 3 | 7 | Autodesk Revit | Including embodied environmental impact evaluation results into BIM objects | –                   | ADP; AP; EP; GWP; ODP;POCP               | Parametric modelling                                |
| [49] | Carbon footprint assessment of a typical low rise office building in Malaysia using building information modelling (BIM)             | 2015 | Malasia | Two-storey office building                                 | –   | Complete building                     | –                        | ICE database                        | 3 | 3 | 7              | 7 | 7 | Autodesk Revit | From BIM to Excel sheet                                                     | –                   | Carbon footprint                         | Comparison of six structural models                 |
| [50] | BIM Application to Select Appropriate Design Alternative with Consideration of LCA and LCCA                                          | 2015 | Korea   | 11-storey office building                                  | –   | Complete building                     | –                        | Korea life-cycle inventory          | 3 | 7 | B1-B6          | 7 | 7 | ArchiCAD 15    | From BIM (BoQs) to Excel LCA data → Excel Calculation LCA in Excel          | –                   | Carbon emissions                         | Comparison of three different external skin systems |
| [51] | Life cycle emissions analysis of two nZEB concepts                                                                                   | 2015 | Norway  | Typical two-storey single-family house and office building | –   | one square metre of heated floor area | 60 years                 | Ecoinvent Version 2.2               | 3 | 7 | B1<br>B4<br>B6 | 7 | 7 | Autodesk Revit | From BIM to Excel sheet                                                     | SimaPro version 7.3 | ECOE, OCOE                               |                                                     |
| [52] | A net zero emission concept analysis of a single-family house                                                                        | 2014 | Norway  | Single-family house                                        | –   | one square metre of heated floor area | 30 years<br>Solar panels | Ecoinvent Version 2.2               | 3 | 7 | B4<br>B6       | 7 | 7 | Autodesk Revit | From BIM to Excel sheet                                                     | SimaPro version 7.3 | CO <sub>2</sub> eq, annual energy demand | Sensitivity analysis                                |

|      |                                                                                                                    |      |        |                               |   |                   |          |                                                       |   |   |    |   |   |                |                                                                                              |                                |                                                                         |                                         |
|------|--------------------------------------------------------------------------------------------------------------------|------|--------|-------------------------------|---|-------------------|----------|-------------------------------------------------------|---|---|----|---|---|----------------|----------------------------------------------------------------------------------------------|--------------------------------|-------------------------------------------------------------------------|-----------------------------------------|
| [53] | An Automated BIM Model to Conceptually Design, Analyze, Simulate, and Assess Sustainable Building Projects         | 2014 | Canada | Three-storey office building  | – | Complete building | –        | ATHENA Impact Estimator                               | 3 | 7 | B6 | 7 | 7 | Autodesk Revit | From BIM through ODBC exporting format                                                       | Athena IE LCID                 | AP; EP; GWP; HH; ODP; PEC; PCSP; REP; WRRU                              |                                         |
| [54] | Application of life-cycle assessment to early stage building design for reduced embodied environmental impacts     | 2013 | US     | Residential building          | – | Complete building | –        | In-house database in SimaPro and Athena EcoCalculator | 3 | 7 | 3  | 7 | 7 | DProfiler      | From BIM (BoQs) with UniFormat 2010 classification system to Athena impact estimator/SimaPro | SimaPro, Athena Eco Calculator | CO2eq emissions                                                         | Sensitivity analysis                    |
| [55] | Embodied and operational energy for new-build housing: A case study of construction methods in the UK              | 2013 | UK     | Single-family house           | – | Complete building | 60 years | ICE database                                          | 3 | 7 | B6 | 7 | 7 | –              | From BIM to Excel sheet                                                                      | –                              | ECOE, OCOE                                                              |                                         |
| [56] | Integrating building information modelling with sustainability to design building projects at the conceptual stage | 2013 | Canada | Six-storey apartment building | – | Complete building | –        | Athena Impact estimator, EPD                          | 3 | 7 | 3  | 7 | 7 | Autodesk Revit | From BIM to external database                                                                | Athena IE LCID                 | Fossil fuel, ODP, GWP, human health respiratory effects, SP, AP, health | Developing BIM-LCA integration approach |

Table S2. List of reviewed papers (BIM- LCC integration)

| Reference | Year | Country     | Title                                                                                                                                                        | BIM Tool                      | LCC Analysis Tool                                               | Data Management Tool                                |
|-----------|------|-------------|--------------------------------------------------------------------------------------------------------------------------------------------------------------|-------------------------------|-----------------------------------------------------------------|-----------------------------------------------------|
| [57]      | 2015 | South Korea | BIM application to select appropriate design alternative with consideration of LCA and LCCA                                                                  | Archicad                      | EcoDesigner software, Excel worksheet-based framework           | Microsoft Excel                                     |
| [58]      | 2015 | Hong Kong   | Building information modeling based building design optimization for sustainability                                                                          | Autodesk Ecotect              | Pareto-optimal front                                            | Multi-Objective Particle Swarm Optimization (MOPSO) |
| [59]      | 2017 | Ireland     | Embedding life cycle costing in 5D BIM                                                                                                                       | Autodesk Revit                | CostX 5D BIM software                                           | Exactal CostX with 5D BIM platform                  |
| [60]      | 2017 | Taiwan      | BIM-based approach to simulate building adaptive performance and life cycle costs for an open building design                                                | Autodesk Revit                | NPV, The FDS+EVAC tool, CFD, The daylight analysis software     | Microsoft Excel                                     |
| [61]      | 2018 | Egypt       | BIM-based approach for optimizing life cycle costs of sustainable buildings                                                                                  | Autodesk Revit                | Monte Carlo, Genetic Algorithm(GA)                              | Microsoft Excel                                     |
| [62]      | 2019 | Netherlands | BIM-based life cycle assessment and life cycle costing of an office building in Western Europe                                                               | Autodesk Revit, Tally, Athena | BIMEELCA tool                                                   | LCA database (GaBi), Microsoft Excel                |
| [63]      | 2019 | Denmark     | Implementing life-cycle costing: Data integration between design models and cost calculations                                                                | Autodesk Revit                | Sigma Estimates, 5D BIM cost software Dynamo model              | Molio Price Database, MS Excel-based tool           |
| [64]      | 2019 | Portugal    | BIM-based LCA assessment of seismic strengthening solutions for reinforced concrete precast industrial buildings                                             | Autodesk Revit                | Tally LCA Software                                              | Tally database                                      |
| [65]      | 2019 | Canada      | Simulation-based multi-objective optimization of institutional building renovation considering energy consumption, life-cycle cost and life-cycle assessment | Autodesk Revit                | Simulation-Based Multi-Objective Optimization model             | Take-Off (MTO) table                                |
| [66]      | 2020 | Portugal    | Integration of LCA and LCC analysis within a BIM-based environment                                                                                           | Autodesk Revit                | BIM-LCA/LCC analysis                                            | IfcDoc tool, IDM/MVD                                |
| [67]      | 2020 | South Korea | BIM-based preliminary estimation method considering the life cycle cost for decision-making in the early design phase                                        | Autodesk Revit                | JAVA-based eclipse JSP, Web-based user interface (UI)           | Oracle SQL Developer                                |
| [68]      | 2020 | Morocco     | Development of a BIM-based environmental and economic life cycle assessment tool                                                                             | Autodesk Revit                | BIMEELCA tool, Streamlined LCA/LCC analysis based               | Microsoft Excel, Revit GUI                          |
| [69]      | 2020 | Thailand    | A BIM-integrated relational database management system for evaluating building life-cycle costs                                                              | Autodesk Revit                | Relational database management system (RDBMS)                   | Microsoft Excel                                     |
| [70]      | 2020 | Ghana       | An integrated life cycle assessment of different façade systems for a typical residential building in Ghana                                                  | Autodesk Revit                | Integrated Environmental Solutions Virtual Environment (IES-VE) | Microsoft Excel                                     |

|      |      |       |                                                                                                                                  |                |                                                                               |                                                                              |
|------|------|-------|----------------------------------------------------------------------------------------------------------------------------------|----------------|-------------------------------------------------------------------------------|------------------------------------------------------------------------------|
| [71] | 2021 | Iran  | BIM-based approach to conduct Life Cycle Cost Analysis of resilient buildings at the conceptual stage                            | Autodesk Revit | Green Building Studio (GBS),<br>The developed BIM-LCCA plug-in                | RSMeans cost database, Microsoft Excel, Microsoft Access, Platform Revit API |
| [72] | 2021 | China | A performance data integrated BIM framework for building life-cycle energy efficiency and environmental optimization design      | Autodesk Revit | A performance integrated BIM (P-BIM), Ladybug Tools, EnergyPlus, Octopus tool | Platform Revit API, MySQL, Rhino                                             |
| [73] | 2023 | Iran  | Energy, economic and comfort optimization of building retrofits considering climate change: A simulation-based NSGA-III approach | DesignBuilder  | Simulation-Based Multi-Objective Optimization model, GA                       | Microsoft Excel                                                              |

Table S3. List of reviewed papers (BrIM)

| Different life cycle stages of bridge engineering |                      |                                           |               |                                                |                       |                          |                |                      |                                |                                  |                   |                                |                        |                      |                  |              |
|---------------------------------------------------|----------------------|-------------------------------------------|---------------|------------------------------------------------|-----------------------|--------------------------|----------------|----------------------|--------------------------------|----------------------------------|-------------------|--------------------------------|------------------------|----------------------|------------------|--------------|
|                                                   | Planning and Design  |                                           |               |                                                | Construction schedule |                          |                |                      | Operation and Maintenance      |                                  |                   |                                |                        | Information Exchange |                  |              |
| BIM Practice                                      | _Parametric analysis | _Parametric modeling, _parametric design, | _GHG Emission | _Integrated design _Simulation, _visualization | Construction schedule | Cost and budget estimate | Crane location | Dimension estimation | Bridge Management System (BMS) | Bridge monitoring and inspection | Bridge evaluation | Operation and maintenance cost | Maintenance scheduling | Interoperability     | Data integration | IFC standard |
| References                                        | [74]                 | [75–77]                                   | [78]          | [79–81]                                        | [76,78,82–84]         | [76,78,82,83, 85]        | [86,87]        | [88,89]              | [90]                           | [79,91,92]                       | [93–95]           | [96,97]                        | [98,99]                | [79]                 | [98,100,101]     | [18,102,103] |

|         |                                                                                                                                                                                                                                                                                                                  |                                                                                                                                                                                                                                                                                                                                                                                                                       |                                                                                                                                                                                                      |                                                                                                                                                                                                                                                                 |                                                                                                                                                                                                                                                                                                                                                                                                                                                                                             |                                                                                                                                                                                                                                                                                      |                                                                                                                                                                                                                                                                                              |                                                                                                                                                                                                                                                                                                                                                                                                                                        |                                                                                                                                                                               |                                                                                                                                                                                                                                                                                                                                                                                                                                                                                                                                                                                                                                                                                                                   |                                                                                                                                                                                                                                                                                                                                                                                                                                                                                                                                                                          |                                                                                                                                                                                                                                                                                                                                                                    |                                                                                                                               |                                                                                                                                                                                                                                                      |                                                                                                                                                                                                                                                                                                                                                                                                                                                            |                                                                                                                                                                                                                                                                                                                                                                                                                                                                                                                  |
|---------|------------------------------------------------------------------------------------------------------------------------------------------------------------------------------------------------------------------------------------------------------------------------------------------------------------------|-----------------------------------------------------------------------------------------------------------------------------------------------------------------------------------------------------------------------------------------------------------------------------------------------------------------------------------------------------------------------------------------------------------------------|------------------------------------------------------------------------------------------------------------------------------------------------------------------------------------------------------|-----------------------------------------------------------------------------------------------------------------------------------------------------------------------------------------------------------------------------------------------------------------|---------------------------------------------------------------------------------------------------------------------------------------------------------------------------------------------------------------------------------------------------------------------------------------------------------------------------------------------------------------------------------------------------------------------------------------------------------------------------------------------|--------------------------------------------------------------------------------------------------------------------------------------------------------------------------------------------------------------------------------------------------------------------------------------|----------------------------------------------------------------------------------------------------------------------------------------------------------------------------------------------------------------------------------------------------------------------------------------------|----------------------------------------------------------------------------------------------------------------------------------------------------------------------------------------------------------------------------------------------------------------------------------------------------------------------------------------------------------------------------------------------------------------------------------------|-------------------------------------------------------------------------------------------------------------------------------------------------------------------------------|-------------------------------------------------------------------------------------------------------------------------------------------------------------------------------------------------------------------------------------------------------------------------------------------------------------------------------------------------------------------------------------------------------------------------------------------------------------------------------------------------------------------------------------------------------------------------------------------------------------------------------------------------------------------------------------------------------------------|--------------------------------------------------------------------------------------------------------------------------------------------------------------------------------------------------------------------------------------------------------------------------------------------------------------------------------------------------------------------------------------------------------------------------------------------------------------------------------------------------------------------------------------------------------------------------|--------------------------------------------------------------------------------------------------------------------------------------------------------------------------------------------------------------------------------------------------------------------------------------------------------------------------------------------------------------------|-------------------------------------------------------------------------------------------------------------------------------|------------------------------------------------------------------------------------------------------------------------------------------------------------------------------------------------------------------------------------------------------|------------------------------------------------------------------------------------------------------------------------------------------------------------------------------------------------------------------------------------------------------------------------------------------------------------------------------------------------------------------------------------------------------------------------------------------------------------|------------------------------------------------------------------------------------------------------------------------------------------------------------------------------------------------------------------------------------------------------------------------------------------------------------------------------------------------------------------------------------------------------------------------------------------------------------------------------------------------------------------|
| Outcome | <p>_At the conceptual bridge design stage, the proposed BrIM system incorporates several bridge MR and R solutions into a multi-criteria decision making method (MCDM) to obtain competitive priority ratings.</p> <p>_ By exporting BrIM input databases in IFC file format, information loss is minimised.</p> | <p>_ Bridge models in three dimensions that took into account WBS and PBS-enabled digital mock-ups, design improvement, and accelerated construction engineers' learning.</p> <p>_ A virtual bridge assembly allowed for the identification of various faults in two-dimensional drawings.</p> <p>_ The knowledge of structural configuration is improved by 3D models and DMU, particularly for complex systems.</p> | <p>_ calculating the embodied carbon emissions of the raw materials and the carbon emissions produced by the machinery in the initial stages of the bridge lifecycle using 6D BIM methodologies,</p> | <p>_ Engineers may access and update model data for the bridge life cycle analysis and control, including minimising tolerances during the erection stage and some unanticipated damage/deterioration during operation, thanks to the master digital model.</p> | <p>_ 3D BrIM was used to cut the construction time and the productivity of the site's operation was increased;</p> <p>_ Utilizing BIM could help with difficult project scheduling and result in cost savings by reducing the need for change orders and rework;</p> <p>_ The value of the planned percentage completion (PPC) range increased by installation of piles at various locations within the limits of the site space ensured by 4D visualisation of the construction phase;</p> | <p>_ by integrating the BrIM model with 3D models, It makes it easier to conduct precise cost estimates</p> <p>_ projected costs, and actual costs were all recorded using 4D BrIM. Earned value calculations were then made, and the budget and schedule status was ascertained</p> | <p>_ Importing the crane model and modelling the erection process might help choose the ideal crane position when utilising a 3D model.</p> <p>_ Planning for lifting operations and construction monitoring are streamlined through the use of BIM and unmanned aerial vehicles (UAVs).</p> | <p>_ 92.2% of the dimensions calculated using the suggested technique (automated production of as-built BIM of precast concrete panels using laser scan data) differed by less than 3 mm from the measurements determined by manual measurement.</p> <p>_ a new framework that uses camera-based unmanned aerial systems (UASs) to gather and analyse inspection data, and BrIM to store and manage all associated inspection data</p> | <p>_ A balanced approach to decision-making is suggested for the management of bridge maintenance under various limitations, such as cost optimization and expert advice.</p> | <p>_ Using the created dynamic BIM viewer, key structural performance parameters may be dynamically shown. Significant cost savings could be achieved by reducing tactile and visual inspections and maintenance by implementing BIM features during an asset's operational period.</p> <p>_Actual deformation curves more closely matched the deformation displacement curves obtained by the BIM monitoring system.</p> <p>_A chain of algorithms based on a computer vision was embedded into an AR device that aims to enhance the precision and performance of inspection tasks. After, the technical damage report is fed-back to the management system and is available for assessment and discussion.</p> | <p>_ The random spatiotemporal conflict detection approach can help decision-makers look into various demolition start dates by efficiently calculating the random conflict likelihood due to the change in reconstruction work time.</p> <p>_BrIM for inspection and evaluation method offers a way to gather, store, and use location-based damage data from a bridge inspection by using BIM software to analyse and present that data to help with decisions by allowing the user to evaluate damages based on location and offering maintenance recommendations</p> | <p>_Accurately predicted the operation and maintenance cost of target projects.</p> <p>_ Through the actual data, the effect of operation and maintenance management was verified and operation and maintenance cost was reduced.</p> <p>_A bridge data management system could significantly help engineers to save time and money on inspection and repairs.</p> | <p>_Maintenance engineers were able to perform their daily tasks in nearly 50% less time and with 20–40% higher accuracy.</p> | <p>_Addressed the existing collaboration gap among different stakeholders and the discontinuity of information between the various stages of bridge projects. Digital models need to be updated by adding more information on their performance.</p> | <p>_Four-dimensional modeling has the potential to provide an effective means of sustainable integration of various data categories with 3D models of an infrastructure over its lifetime.</p> <p>_Damaged data structure and semantics definitions proposed.</p> <p>_ It is possible to either apply the proposed approach to an external IFC file and simply link it with BMS or insert an IFC representation of every specific bridge into the BMS.</p> | <p>_Developed rules of unique identifier and information reassignment, and applied a semi-automated naming algorithm.</p> <p>_It was observed that information retrieval and extraction for components was possible through a semantic-based query to the generated IFC-based bridge information model.</p> <p>_Developed a system to cross-reference proposed entities, relationships and attributes with the existing structure of IFC to highlight unique information and those already described by IFC.</p> |
|---------|------------------------------------------------------------------------------------------------------------------------------------------------------------------------------------------------------------------------------------------------------------------------------------------------------------------|-----------------------------------------------------------------------------------------------------------------------------------------------------------------------------------------------------------------------------------------------------------------------------------------------------------------------------------------------------------------------------------------------------------------------|------------------------------------------------------------------------------------------------------------------------------------------------------------------------------------------------------|-----------------------------------------------------------------------------------------------------------------------------------------------------------------------------------------------------------------------------------------------------------------|---------------------------------------------------------------------------------------------------------------------------------------------------------------------------------------------------------------------------------------------------------------------------------------------------------------------------------------------------------------------------------------------------------------------------------------------------------------------------------------------|--------------------------------------------------------------------------------------------------------------------------------------------------------------------------------------------------------------------------------------------------------------------------------------|----------------------------------------------------------------------------------------------------------------------------------------------------------------------------------------------------------------------------------------------------------------------------------------------|----------------------------------------------------------------------------------------------------------------------------------------------------------------------------------------------------------------------------------------------------------------------------------------------------------------------------------------------------------------------------------------------------------------------------------------|-------------------------------------------------------------------------------------------------------------------------------------------------------------------------------|-------------------------------------------------------------------------------------------------------------------------------------------------------------------------------------------------------------------------------------------------------------------------------------------------------------------------------------------------------------------------------------------------------------------------------------------------------------------------------------------------------------------------------------------------------------------------------------------------------------------------------------------------------------------------------------------------------------------|--------------------------------------------------------------------------------------------------------------------------------------------------------------------------------------------------------------------------------------------------------------------------------------------------------------------------------------------------------------------------------------------------------------------------------------------------------------------------------------------------------------------------------------------------------------------------|--------------------------------------------------------------------------------------------------------------------------------------------------------------------------------------------------------------------------------------------------------------------------------------------------------------------------------------------------------------------|-------------------------------------------------------------------------------------------------------------------------------|------------------------------------------------------------------------------------------------------------------------------------------------------------------------------------------------------------------------------------------------------|------------------------------------------------------------------------------------------------------------------------------------------------------------------------------------------------------------------------------------------------------------------------------------------------------------------------------------------------------------------------------------------------------------------------------------------------------------|------------------------------------------------------------------------------------------------------------------------------------------------------------------------------------------------------------------------------------------------------------------------------------------------------------------------------------------------------------------------------------------------------------------------------------------------------------------------------------------------------------------|



## References

1. Xu, J.; Teng, Y.; Pan, W.; Zhang, Y. BIM-Integrated LCA to Automate Embodied Carbon Assessment of Prefabricated Buildings. *JOURNAL OF CLEANER PRODUCTION* **2022**, *374*, doi:10.1016/j.jclepro.2022.133894.
2. Morsi, D.; Ismaeel, W.; Ehab, A.; Othman, A. BIM-Based Life Cycle Assessment for Different Structural System Scenarios of a Residential Building. *AIN SHAMS ENGINEERING JOURNAL* **2022**, *13*, doi:10.1016/j.asej.2022.101802.
3. Lee, S.; Tae, S.; Jang, H.; Chae, C.; Bok, Y. Development of Building Information Modeling Template for Environmental Impact Assessment. *SUSTAINABILITY* **2021**, *13*, doi:10.3390/su13063092.
4. Abouhamad, M.; Abu-Hamd, M. Life Cycle Assessment Framework for Embodied Environmental Impacts of Building Construction Systems. *SUSTAINABILITY* **2021**, *13*, doi:10.3390/su13020461.
5. Sameer, H.; Bringezu, S. Building Information Modelling Application of Material, Water, and Climate Footprint Analysis. *BUILDING RESEARCH AND INFORMATION* **2021**, *49*, 593–612, doi:10.1080/09613218.2020.1864266.
6. Tushar, Q.; Bhuiyan, M.; Zhang, G.; Maqsood, T. An Integrated Approach of BIM-Enabled LCA and Energy Simulation: The Optimized Solution towards Sustainable Development. *JOURNAL OF CLEANER PRODUCTION* **2021**, *289*, doi:10.1016/j.jclepro.2020.125622.
7. Jalaei, F.; Zoghi, M.; Khoshand, A. Life Cycle Environmental Impact Assessment to Manage and Optimize Construction Waste Using Building Information Modeling (BIM). *INTERNATIONAL JOURNAL OF CONSTRUCTION MANAGEMENT* **2021**, *21*, 784–801, doi:10.1080/15623599.2019.1583850.
8. Abbasi, S.; Noorzai, E. The BIM-Based Multi-Optimization Approach in Order to Determine the Trade-off between Embodied and Operation Energy Focused on Renewable Energy Use. *JOURNAL OF CLEANER PRODUCTION* **2021**, *281*, doi:10.1016/j.jclepro.2020.125359.
9. Naneva, A.; Bonanomi, M.; Hollberg, A.; Habert, G.; Hall, D. Integrated BIM-Based LCA for the Entire Building Process Using an Existing Structure for Cost Estimation in the Swiss Context. *SUSTAINABILITY* **2020**, *12*, doi:10.3390/su12093748.
10. Soust-Verdaguer, B.; Llatas, C.; Moya, L. Comparative BIM-Based Life Cycle Assessment of Uruguayan Timber and Concrete-Masonry Single-Family Houses in Design Stage. *JOURNAL OF CLEANER PRODUCTION* **2020**, *277*, doi:10.1016/j.jclepro.2020.121958.
11. Ansah, M.K.; Chen, X.; Yang, H.; Lu, L.; Lam, P.T.I. An Integrated Life Cycle Assessment of Different Façade Systems for a Typical Residential Building in Ghana. *Sustainable Cities and Society* **2020**, *53*, 101974, doi:10.1016/j.scs.2019.101974.
12. Cheng, B.; Li, J.; Tam, V.; Yang, M.; Chen, D. A BIM-LCA Approach for Estimating the Greenhouse Gas Emissions of Large-Scale Public Buildings: A Case Study. *SUSTAINABILITY* **2020**, *12*, doi:10.3390/su12020685.
13. Hollberg, A.; Genova, G.; Habert, G. Evaluation of BIM-Based LCA Results for Building Design. *AUTOMATION IN CONSTRUCTION* **2020**, *109*, doi:10.1016/j.autcon.2019.102972.
14. Kiamili, C.; Hollberg, A.; Habert, G. Detailed Assessment of Embodied Carbon of HVAC Systems for a New Office Building Based on BIM. *SUSTAINABILITY* **2020**, *12*, doi:10.3390/su12083372.
15. Vilutiene, T.; Kumetaitis, G.; Kiaulakis, A.; Kalibatas, D. Assessing the Sustainability of Alternative Structural Solutions of a Building: A Case Study. *Buildings* **2020**, *10*, 36, doi:10.3390/buildings10020036.
16. Santos, R.; Aguiar Costa, A.; Silvestre, J.D.; Pyl, L. Development of a BIM-Based Environmental and Economic Life Cycle Assessment Tool. *Journal of Cleaner Production* **2020**, *265*, 121705, doi:10.1016/j.jclepro.2020.121705.
17. Santos, R.; Costa, A.; Silvestre, J.; Vandenbergh, T.; Pyl, L. BIM-Based Life Cycle Assessment and Life Cycle Costing of an Office Building in Western Europe. *BUILDING AND ENVIRONMENT* **2020**, *169*, doi:10.1016/j.buildenv.2019.106568.
18. Wang, N.; Satola, D.; Wiberg, A.; Liu, C.; Gustaysen, A. Reduction Strategies for Greenhouse Gas Emissions from High-Speed Railway Station Buildings in a Cold Climate Zone of China. *SUSTAINABILITY* **2020**, *12*, doi:10.3390/su12051704.
19. Kiss, B.; Szalay, Z. Modular Approach to Multi-Objective Environmental Optimization of Buildings. *AUTOMATION IN CONSTRUCTION* **2020**, *111*, doi:10.1016/j.autcon.2019.103044.
20. Feng, H.; Liyanage, D.; Karunathilake, H.; Sadiq, R.; Hewage, K. BIM-Based Life Cycle Environmental Performance Assessment of Single-Family Houses: Renovation and Reconstruction Strategies for Aging Building Stock in British Columbia. *JOURNAL OF CLEANER PRODUCTION* **2020**, *250*, doi:10.1016/j.jclepro.2019.119543.

21. Xu, Z.; Wang, S.; Wang, E. Integration of BIM and Energy Consumption Modelling for Manufacturing Prefabricated Components: A Case Study in China. *ADVANCES IN CIVIL ENGINEERING* **2019**, *2019*, doi:10.1155/2019/1609523.
22. Lu, K.; Jiang, X.; Tam, V.; Li, M.; Wang, H.; Xia, B.; Chen, Q. Development of a Carbon Emissions Analysis Framework Using Building Information Modeling and Life Cycle Assessment for the Construction of Hospital Projects. *SUSTAINABILITY* **2019**, *11*, doi:10.3390/su11226274.
23. Rezaei, F.; Bulle, C.; Lesage, P. Integrating Building Information Modeling and Life Cycle Assessment in the Early and Detailed Building Design Stages. *BUILDING AND ENVIRONMENT* **2019**, *153*, 158–167, doi:10.1016/j.buildenv.2019.01.034.
24. Cavalliere, C.; Habert, G.; Dell’Osso, G.; Hollberg, A. Continuous BIM-Based Assessment of Embodied Environmental Impacts throughout the Design Process. *JOURNAL OF CLEANER PRODUCTION* **2019**, *211*, 941–952, doi:10.1016/j.jclepro.2018.11.247.
25. Nilsen, M.; Bohne, R. Evaluation of BIM Based LCA in Early Design Phase (Low LOD) of Buildings.; Passer, A., Lutzkendorf, T., Habert, G., KrompKolb, H., Monsberger, M., Eds.; 2019; Vol. 323.
26. Najjar, M.; Figueiredo, K.; Hammad, A.; Haddad, A. Integrated Optimization with Building Information Modeling and Life Cycle Assessment for Generating Energy Efficient Buildings. *APPLIED ENERGY* **2019**, *250*, 1366–1382, doi:10.1016/j.apenergy.2019.05.101.
27. Najjar, M.; Figueiredo, K.; Evangelista, A.; Hammad, A.; Tam, V.; Haddad, A. Life Cycle Assessment Methodology Integrated with BIM as a Decision-Making Tool at Early-Stages of Building Design. *INTERNATIONAL JOURNAL OF CONSTRUCTION MANAGEMENT* **2019**, *22*, 541–555, doi:10.1080/15623599.2019.1637098.
28. Sharif, S.A.; Hammad, A. Simulation-Based Multi-Objective Optimization of Institutional Building Renovation Considering Energy Consumption, Life-Cycle Cost and Life-Cycle Assessment. *Journal of Building Engineering* **2019**, *21*, 429–445, doi:10.1016/j.jobe.2018.11.006.
29. Castro, R.; Pasanen, P. How to Design Buildings with Life Cycle Assessment by Accounting for the Material Flows in Refurbishment. *IOP Conf. Ser.: Earth Environ. Sci.* **2019**, *225*, 012019, doi:10.1088/1755-1315/225/1/012019.
30. Hasik, V.; Escott, E.; Bates, R.; Carlisle, S.; Faircloth, B.; Bilec, M.M. Comparative Whole-Building Life Cycle Assessment of Renovation and New Construction. *Building and Environment* **2019**, *161*, 106218, doi:10.1016/j.buildenv.2019.106218.
31. Stevanovic, M.; Allacker, K.; Vermeulen, S. Development of an Approach to Assess the Life Cycle Environmental Impacts and Costs of General Hospitals through the Analysis of a Belgian Case. *Sustainability* **2019**, *11*, doi:10.3390/su11030856.
32. Shadram, F.; Mukkavaara, J. An Integrated BIM-Based Framework for the Optimization of the Trade-off between Embodied and Operational Energy. *ENERGY AND BUILDINGS* **2018**, *158*, 1189–1205, doi:10.1016/j.enbuild.2017.11.017.
33. Rock, M.; Hollberg, A.; Habert, G.; Passer, A. LCA and BIM: Visualization of Environmental Potentials in Building Construction at Early Design Stages. *BUILDING AND ENVIRONMENT* **2018**, *140*, 153–161, doi:10.1016/j.buildenv.2018.05.006.
34. Nizam, R.; Zhang, C.; Tian, L. A BIM Based Tool for Assessing Embodied Energy for Buildings. *ENERGY AND BUILDINGS* **2018**, *170*, 1–14, doi:10.1016/j.enbuild.2018.03.067.
35. Yang, X.; Hu, M.; Wu, J.; Zhao, B. Building-Information-Modeling Enabled Life Cycle Assessment, a Case Study on Carbon Footprint Accounting for a Residential Building in China. *JOURNAL OF CLEANER PRODUCTION* **2018**, *183*, 729–743, doi:10.1016/j.jclepro.2018.02.070.
36. Soust-Verdaguer, B.; Llatas, C.; Garcia-Martinez, A.; de Cozar, J. BIM-Based LCA Method to Analyze Envelope Alternatives of Single-Family Houses: Case Study in Uruguay. *JOURNAL OF ARCHITECTURAL ENGINEERING* **2018**, *24*, doi:10.1061/(ASCE)AE.1943-5568.0000303.
37. Bueno, C.; Fabricio, M. Comparative Analysis between a Complete LCA Study and Results from a BIM-LCA Plug-In. *AUTOMATION IN CONSTRUCTION* **2018**, *90*, 188–200, doi:10.1016/j.autcon.2018.02.028.
38. Bueno, C.; Pereira, L.; Fabricio, M. Life Cycle Assessment and Environmental-Based Choices at the Early Design Stages: An Application Using Building Information Modelling. *ARCHITECTURAL ENGINEERING AND DESIGN MANAGEMENT* **2018**, *14*, 332–346, doi:10.1080/17452007.2018.1458593.
39. Eleftheriadis, S.; Duffour, P.; Mumovic, D. BIM-Embedded Life Cycle Carbon Assessment of RC Buildings Using Optimised Structural Design Alternatives. *ENERGY AND BUILDINGS* **2018**, *173*, 587–600, doi:10.1016/j.enbuild.2018.05.042.

40. Crippa, J.; Boeing, L.C.; Caparelli, A.P.A.; da Costa, M. do R. de M.M.; Scheer, S.; Araujo, A.M.F.; Bem, D. A BIM–LCA Integration Technique to Embodied Carbon Estimation Applied on Wall Systems in Brazil. *Built Environment Project and Asset Management* **2018**, *8*, 491–503, doi:10.1108/BEPAM-10-2017-0093.
41. Marzouk, M.; Abdelkader, E.M.; Al-Gahtani, K. Building Information Modeling-Based Model for Calculating Direct and Indirect Emissions in Construction Projects. *Journal of Cleaner Production* **2017**, *152*, 351–363, doi:10.1016/j.jclepro.2017.03.138.
42. Najjar, M.; Figueiredo, K.; Palumbo, M.; Haddad, A. Integration of BIM and LCA: Evaluating the Environmental Impacts of Building Materials at an Early Stage of Designing a Typical Office Building. *JOURNAL OF BUILDING ENGINEERING* **2017**, *14*, 115–126, doi:10.1016/j.job.2017.10.005.
43. Schultz, J.; Ku, K.; Gindlesperger, M.; Doerfler, J. A Benchmark Study of BIM-Based Whole-Building Life-Cycle Assessment Tools and Processes. *International Journal of Sustainable Building Technology and Urban Development* **2017**, *7*, 219–229, doi:10.1080/2093761X.2017.1302839.
44. Shadram, F.; Johansson, T.; Lu, W.; Schade, J.; Olofsson, T. An Integrated BIM-Based Framework for Minimizing Embodied Energy during Building Design. *ENERGY AND BUILDINGS* **2016**, *128*, 592–604, doi:10.1016/j.enbuild.2016.07.007.
45. Santos, R.; Aguiar Costa, A. *BIM in LCA/LCEA Analysis: Comparative Analysis of Multi-Family House and Single-Family*; 2016;
46. Peng, C. Calculation of a Building's Life Cycle Carbon Emissions Based on Ecotect and Building Information Modeling. *JOURNAL OF CLEANER PRODUCTION* **2016**, *112*, 453–465, doi:10.1016/j.jclepro.2015.08.078.
47. Ajayi, S.; Oyedele, L.; Ceranic, D.B.; Gallanagh, M.; Kadiri, K. Life Cycle Environmental Performance of Material Specification: A BIM-Enhanced Comparative Assessment. *International Journal of Sustainable Building Technology and Urban Development* **2015**, *6*, doi:10.1080/2093761X.2015.1006708.
48. Lee, S.; Tae, S.; Roh, S.; Kim, T. Green Template for Life Cycle Assessment of Buildings Based on Building Information Modeling: Focus on Embodied Environmental Impact. *SUSTAINABILITY* **2015**, *7*, 16498–16512, doi:10.3390/su71215830.
49. Shafiq, N. Carbon Footprint Assessment of a Typical Low Rise Office Building in Malaysia Using Building Information Modelling (BIM). *International Journal of Sustainable Building Technology and Urban Development* **2015**, *6*, doi:10.1080/2093761X.2015.1057876.
50. Shin, Y.; Cho, K. BIM Application to Select Appropriate Design Alternative with Consideration of LCA and LCCA. *MATHEMATICAL PROBLEMS IN ENGINEERING* **2015**, *2015*, doi:10.1155/2015/281640.
51. Georges, L.; Haase, M.; Houlihan Wiberg, A.; Kristjansdottir, T.; Risholt, B. Life Cycle Emissions Analysis of Two NZEB Concepts. *Building Research & Information* **2015**, *43*, 82–93, doi:10.1080/09613218.2015.955755.
52. Houlihan Wiberg, A.; Georges, L.; Dokka, T.H.; Haase, M.; Time, B.; Lien, A.G.; Mellegård, S.; Maltha, M. A Net Zero Emission Concept Analysis of a Single-Family House. *Energy and Buildings* **2014**, *74*, 101–110, doi:10.1016/j.enbuild.2014.01.037.
53. Jalaei, F.; Jrade, A. An Automated BIM Model to Conceptually Design, Analyze, Simulate, and Assess Sustainable Building Projects. *Journal of Construction Engineering* **2014**, *2014*, e672896, doi:10.1155/2014/672896.
54. Basbagill, J.; Flager, F.; Lepech, M.; Fischer, M. Application of Life-Cycle Assessment to Early Stage Building Design for Reduced Embodied Environmental Impacts. *BUILDING AND ENVIRONMENT* **2013**, *60*, 81–92, doi:10.1016/j.buildenv.2012.11.009.
55. Iddon, C.; Firth, S. Embodied and Operational Energy for New-Build Housing: A Case Study of Construction Methods in the UK. *ENERGY AND BUILDINGS* **2013**, *67*, 479–488, doi:10.1016/j.enbuild.2013.08.041.
56. Jrade, A.; Jalaei, F. Integrating Building Information Modelling with Sustainability to Design Building Projects at the Conceptual Stage. *BUILDING SIMULATION* **2013**, *6*, 429–444, doi:10.1007/s12273-013-0120-0.
57. Shin, Y.; Cho, K. BIM Application to Select Appropriate Design Alternative with Consideration of LCA and LCCA. *Mathematical Problems in Engineering* **2015**, *2015*, 281640, doi:10.1155/2015/281640.
58. Liu, S.; Meng, X.; Tam, C. Building Information Modeling Based Building Design Optimization for Sustainability. *Energy and Buildings* **2015**, *105*, 139–153, doi:10.1016/J.ENBUILD.2015.06.037.
59. Kehily, D.; Underwood, J. EMBEDDING LIFE CYCLE COSTING IN 5D BIM.
60. Juan, Y.-K.; Hsing, N.-P. BIM-Based Approach to Simulate Building Adaptive Performance and Life Cycle Costs for an Open Building Design. *Applied Sciences* **2017**, *7*, doi:10.3390/app7080837.

61. Marzouk, M.; Azab, S.; Metawie, M. BIM-Based Approach for Optimizing Life Cycle Costs of Sustainable Buildings. *Journal of Cleaner Production* **2018**, *188*, 217–226, doi:10.1016/j.jclepro.2018.03.280.
62. Santos, R.; Costa, A.A.; Silvestre, J.D.; Pyl, L. Integration of LCA and LCC Analysis within a BIM-Based Environment. *Automation in Construction* **2019**, *103*, 127–149, doi:10.1016/j.autcon.2019.02.011.
63. Saridaki, M.; Haugbølle, K. Implementing Life-Cycle Costing: Data Integration between Design Models and Cost Calculations. *Electronic Journal of Information Technology in Construction* **2019**, *24*, 14–32.
64. Raposo, C.; Rodrigues, F.; Rodrigues, H. BIM-Based LCA Assessment of Seismic Strengthening Solutions for Reinforced Concrete Precast Industrial Buildings. *Innovative Infrastructure Solutions* **2019**, *4*, 51, doi:10.1007/s41062-019-0239-7.
65. Sharif, S.A.; Hammad, A. Simulation-Based Multi-Objective Optimization of Institutional Building Renovation Considering Energy Consumption, Life-Cycle Cost and Life-Cycle Assessment. *Journal of Building Engineering* **2019**, *21*, 429–445, doi:10.1016/j.job.2018.11.006.
66. Santos, R.; Costa, A.A.; Silvestre, J.D.; Vandenberg, T.; Pyl, L. BIM-Based Life Cycle Assessment and Life Cycle Costing of an Office Building in Western Europe. *Building and Environment* **2020**, *169*, 106568–106568, doi:10.1016/j.buildenv.2019.106568.
67. Lee, J.; Yang, H.; Lim, J.; Hong, T.; Kim, J.; Jeong, K. BIM-Based Preliminary Estimation Method Considering the Life Cycle Cost for Decision-Making in the Early Design Phase. *Journal of Asian Architecture and Building Engineering* **2020**, *19*, 384–399, doi:10.1080/13467581.2020.1748635.
68. Santos, R.; Aguiar Costa, A.; Silvestre, J.D.; Pyl, L. Development of a BIM-Based Environmental and Economic Life Cycle Assessment Tool. *Journal of Cleaner Production* **2020**, *265*, 121705, doi:10.1016/j.jclepro.2020.121705.
69. Le, H.T.T.; Likhitrungsilp, V.; Yabuki, N. A BIM-Integrated Relational Database Management System for Evaluating Building Life-Cycle Costs. *EJ* **2020**, *24*, 75–86, doi:10.4186/ej.2020.24.2.75.
70. Ansah, M.K.; Chen, X.; Yang, H.; Lu, L.; Lam, P.T.I. An Integrated Life Cycle Assessment of Different Façade Systems for a Typical Residential Building in Ghana. *Sustainable Cities and Society* **2020**, *53*, 101974–101974, doi:10.1016/j.scs.2019.101974.
71. Rad, M.A.H.; Jalaei, F.; Golpour, A.; Varzande, S.S.H.; Guest, G. BIM-Based Approach to Conduct Life Cycle Cost Analysis of Resilient Buildings at the Conceptual Stage. *Automation in Construction* **2021**, *123*, 103480–103480, doi:10.1016/j.autcon.2020.103480.
72. Zhuang, D.; Zhang, X.; Lu, Y.; Wang, C.; Jin, X.; Zhou, X.; Shi, X. A Performance Data Integrated BIM Framework for Building Life-Cycle Energy Efficiency and Environmental Optimization Design. *Automation in Construction* **2021**, *127*, 103712–103712, doi:10.1016/j.autcon.2021.103712.
73. Mostafazadeh, F.; Eirdmoussa, S.J.; Tavakolan, M. Energy, Economic and Comfort Optimization of Building Retrofits Considering Climate Change: A Simulation-Based NSGA-III Approach. *Energy and Buildings* **2023**, *280*, 112721, doi:10.1016/j.enbuild.2022.112721.
74. Markiz, N.; Jrade, A. Integrating Fuzzy-Logic Decision Support with a Bridge Information Management System (BrIMS) at the Conceptual Stage of Bridge Design. *Journal of Information Technology in Construction (ITcon)* **2018**, *23*, 92–121.
75. Shim, C.S.; Yun, N.R.; Song, H.H. Application of 3D Bridge Information Modeling to Design and Construction of Bridges. In Proceedings of the Procedia Eng.; Hong Kong, 2011; Vol. 14, pp. 95–99.
76. Lee, K.M.; Lee, Y.B.; Shim, C.S.; Park, K.L. Bridge Information Models for Construction of a Concrete Box-Girder Bridge. *Structure and Infrastructure Engineering* **2012**, *8*, 687–703, doi:10.1080/15732471003727977.
77. Shim, C.-S.; Lee, K.-M.; Kang, L.S.; Hwang, J.; Kim, Y. Three-Dimensional Information Model-Based Bridge Engineering in Korea. *Structural Engineering International* **2012**, *22*, 8–13, doi:10.2749/101686612X13216060212834.
78. Kaewunruen, S.; Sresakoolchai, J.; Zhou, Z. Sustainability-Based Lifecycle Management for Bridge Infrastructure Using 6D BIM. *Sustainability* **2020**, *12*, 2436, doi:10.3390/su12062436.
79. Dang, N.-S.; Rho, G.-T.; Shim, C.-S. A Master Digital Model for Suspension Bridges. *Applied Sciences* **2020**, *10*, 7666, doi:10.3390/app10217666.
80. Tanner, P.; Bellod, J.L.; Sanz, D. Paper and Pencil in the Age of BIM. *Structural Engineering International* **2018**, *28*, 396–407, doi:10.1080/10168664.2018.1496782.
81. Hautala, K.; Järvenpää, M.-E.; Pulkkinen, P. Digitalization Transforms the Construction Sector throughout Asset's Life-Cycle from Design to Operation and Maintenance. *Stahlbau* **2017**, *86*, 340–345, doi:10.1002/stab.201710474.

82. Fanning, B.; Clevenger, C.M.; Ozbek, M.E.; Mahmoud, H. Implementing BIM on Infrastructure: Comparison of Two Bridge Construction Projects. *Practice Periodical on Structural Design and Construction* **2015**, *20*, 04014044, doi:10.1061/(ASCE)SC.1943-5576.0000239.
83. Vilventhan, A.; Rajadurai, R. 4D Bridge Information Modelling for Management of Bridge Projects: A Case Study from India. *Built Environ. Proj. Asset Manage.* **2020**, *10*, 423–435, doi:10.1108/BEPAM-05-2019-0045.
84. Marzouk, M.; Hisham, M. Implementing Earned Value Management Using Bridge Information Modeling. *KSCE JOURNAL OF CIVIL ENGINEERING* **2014**, *18*, 1302–1313, doi:10.1007/s12205-014-0455-9.
85. Marzouk, M.M.; Hisham, M. Bridge Information Modeling in Sustainable Bridge Management. In Proceedings of the ICSDC : Integr. Sustainability Pract. Constr. Ind. - Proc. Int. Conf. Sustainable Des. Constr.; Kansas City, MO, 2012; pp. 457–466.
86. Marzouk, M.; Hisham, M. A Hybrid Model for Selecting Location of Mobile Cranes in Bridge Construction Projects. *Baltic J. Road Bridge Eng.* **2013**, *8*, 184–189, doi:10.3846/bjrbe.2013.23.
87. Tian, H.; Wang, J.; Cao, S.; Chen, Y.; Li, L. Probabilistic Assessment of the Safety of Main Cables for Long-Span Suspension Bridges Considering Corrosion Effects. *Advances in Civil Engineering* **2021**, *2021*, e6627762, doi:10.1155/2021/6627762.
88. Wang, Q.; Sohn, H.; Cheng, J.C.P. Automatic As-Built BIM Creation of Precast Concrete Bridge Deck Panels Using Laser Scan Data. *Journal of Computing in Civil Engineering* **2018**, *32*, 04018011, doi:10.1061/(ASCE)CP.1943-5487.0000754.
89. Xu, Y.; Turkan, Y. BrIM and UAS for Bridge Inspections and Management. *Eng. Constr. Archit. Manage.* **2020**, *27*, 785–807, doi:10.1108/ECAM-12-2018-0556.
90. Almomani, H.; Almutairi, O.N. Life-Cycle Maintenance Management Strategies for Bridges in Kuwait. *J. Environ. Treat. Tech.* **2020**, *8*, 1556–1562, doi:10.47277/JETT/8(4)1562.
91. Davila Delgado, J.M.; Butler, L.J.; Brilakis, I.; Elshafie, M.Z.E.B.; Middleton, C.R. Structural Performance Monitoring Using a Dynamic Data-Driven BIM Environment. *Journal of Computing in Civil Engineering* **2018**, *32*, 04018009, doi:10.1061/(ASCE)CP.1943-5487.0000749.
92. Xia, Y. Research on Dynamic Data Monitoring of Steel Structure Building Information Using BIM. *Journal of Engineering, Design and Technology* **2020**, *18*, 1165–1173, doi:10.1108/JEDT-11-2019-0308.
93. Mawlana, M.; Vahdatikhaki, F.; Doriani, A.; Hammad, A. Integrating 4D Modeling and Discrete Event Simulation for Phasing Evaluation of Elevated Urban Highway Reconstruction Projects. *Automation in Construction* **2015**, *60*, 25–38, doi:10.1016/j.autcon.2015.09.005.
94. McGuire, B.; Atadero, R.; Clevenger, C.; Ozbek, M. Bridge Information Modeling for Inspection and Evaluation. *J Bridge Eng* **2016**, *21*, doi:10.1061/(ASCE)BE.1943-5592.0000850.
95. Nettis, A.; Saponaro, M.; Nanna, M. RPAS-Based Framework for Simplified Seismic Risk Assessment of Italian RC-Bridges. *Buildings* **2020**, *10*, 150, doi:10.3390/buildings10090150.
96. Shim, C.; Kang, H.; Dang, N.S.; Lee, D. Development of BIM-Based Bridge Maintenance System for Cable-Stayed Bridges. *I* **2017**, *20*, 697–708.
97. Jeong, S.; Hou, R.; Lynch, J.P.; Sohn, H.; Law, K.H. An Information Modeling Framework for Bridge Monitoring. *Adv Eng Software* **2017**, *114*, 11–31, doi:10.1016/j.advengsoft.2017.05.009.
98. Zhang, Z.; Hamledari, H.; Billington, S.; Fischer, M. 4D beyond Construction: Spatio-Temporal and Life-Cyclic Modeling and Visualization of Infrastructure Data. *Electronic Journal of Information Technology in Construction* **2018**, *23*, 285–304.
99. Parlakad, A.K.; Catton, P. Infrastructure Information Management of Bridges at Local Authorities in the UK. **2018**, doi:10.17863/CAM.23129.
100. Isailović, D.; Stojanovic, V.; Trapp, M.; Richter, R.; Hajdin, R.; Döllner, J. Bridge Damage: Detection, IFC-Based Semantic Enrichment and Visualization. *Automation in Construction* **2020**, *112*, 103088, doi:10.1016/j.autcon.2020.103088.
101. Hüthwohl, P.; Brilakis, I.; Borrmann, A.; Sacks, R. Integrating RC Bridge Defect Information into BIM Models. *Journal of Computing in Civil Engineering* **2018**, *32*, 04018013, doi:10.1061/(ASCE)CP.1943-5487.0000744.
102. Park, S.I.; Park, J.; Kim, B.-G.; Lee, S.-H. Improving Applicability for Information Model of an IFC-Based Steel Bridge in the Design Phase Using Functional Meanings of Bridge Components. *Applied Sciences* **2018**, *8*, 2531, doi:10.3390/app8122531.
103. Floros, G.S.; Boyes, G.; Owens, D.; Ellul, C. DEVELOPING IFC FOR INFRASTRUCTURE: A CASE STUDY OF THREE HIGHWAY ENTITIES. In Proceedings of the ISPRS Annals of the Photogrammetry, Remote Sensing and Spatial Information Sciences; Copernicus GmbH, September 23 2019; Vol. IV-4-W8, pp. 59–66.
